# Supplementary material for: Global DNA Methylation in Dental Implant Failure Due to Peri-Implantitis: An Exploratory Clinical Pilot Study
Source: MDPI journal article supplement (doi:10.3390/ijerph19021020), 2022-01-17
Supplement: s1 [file s1]

# **Global DNA Methylation in Dental Implant Failure due to Peri-implantitis: An Exploratory Clinical Pilot Study.**

## **SUPPLEMENTARY I**

### **BRIEF DESCRIPTION OF EACH RECORDED VARIABLE**

#### **Demographics**

Subject demographics, including age, gender, race/ethnicity, and tobacco history were documented.

#### **Medical and Dental History Recording**

Relevant medical history (e.g., systemic diseases) and current medical conditions were recorded. The dental history included dental status information as well as a description of the dental implant characteristics.

#### **Clinical Measurements**

All clinical measurements were performed on teeth and dental implants at six locations; distobuccal (DB), buccal (B), mesiobuccal (MB), distopalatal (DP), palatal (P), mesiopalatal (MP) using a manual periodontal probe (UNC 15, Hu-Friedy, Chicago, IL, USA) by the same investigator. The following clinical measurements were evaluated:

1. Probing depth (PD): distance from the bottom of the pocket to the gingival margin (GM) in millimeters.
2. Gingival recession (GR): measurement of distance from Cemento Enamel Junction (CEJ) to GM.
3. Clinical attachment level (CAL): calculated by subtracting the GR from the PD.
4. Bleeding on probing (BOP): assessed after PD measurements. A dichotomous scoring system normally use with one (1) and zero (0) equaling presence or absence of bleeding 60 seconds after probing the pocket, respectively.
5. Keratinized tissue height (KT): assessed from free gingival margin to muco-gingival junction in mid-buccal for implants that were removed.

### **Radiographic Assessments**

A full mouth radiograph series and/or a panoramic were done for patients that met the inclusion and to analyze their periodontal staging disease. In case of the IF group, an intra-oral radiograph and/or CBCT scan were performed for crestal bone loss (BL) analysis.

Table S1. Implant characteristics

|                                 | Subject ID                        |            | 2             | 7             | 11          | 12            | 13          | 15     | 16          | 17            | 18          |
|---------------------------------|-----------------------------------|------------|---------------|---------------|-------------|---------------|-------------|--------|-------------|---------------|-------------|
| Implant<br>Details              | Implant Site (ADA)                |            | 13            | 31            | 20          | 31            | 13          | 5      | 29          | 19            | 29          |
|                                 | Manufacturer/System               |            | Nobel Biocare | Nobel Biocare | BTI         | Nobel Biocare | Klockner    | BTI    | BTI         | Nobel Biocare | BTI         |
|                                 | Diameter                          |            | 3,3           | 3,75          | 5           | 5             | 3,5         | 4      | 3,75        | 5             | 3,75        |
|                                 | Length                            |            | 13            | 8,5           | 13          | 8,5           | 15          | 8,5    | 8,5         | 13            | 8,5         |
|                                 | Surface                           |            | MKIII TiUnite | NP TiUnite    | Acid etched | MKIII TiUnite | Ti blasting | Optima | Acid etched | MKIII TiUnite | Acid etched |
|                                 | Platform                          | Matching   | ✓             | ✓             | ✓           | ✓             | ✓           | ✓      | ✓           | ✓             | ✓           |
|                                 |                                   | Switching  |               |               |             |               |             |        |             |               |             |
| Prosthesis<br>Details           | Abutment                          | Stock      | ✓             | ✓             | ✓           | ✓             | ✓           | ✓      | ✓           | ✓             | ✓           |
|                                 |                                   | Custom     |               |               |             |               |             |        |             |               |             |
|                                 | Restoration                       | Cemented   |               |               |             | ✓             |             |        |             |               |             |
|                                 |                                   | Screw      | ✓             | ✓             | ✓           |               | ✓           | ✓      | ✓           | ✓             | ✓           |
|                                 | Loading                           | Immediate  |               | unk           | ✓           |               | unk         | ✓      |             |               |             |
|                                 |                                   | Delayed    | ✓             | unk           |             | ✓             | unk         |        | ✓           | ✓             | ✓           |
|                                 | Type                              | Splint     | ✓             | ✓             | ✓           | ✓             | ✓           | ✓      | ✓           |               | ✓           |
|                                 |                                   | Non/Splint |               |               |             |               |             |        |             | ✓             |             |
|                                 | Date of implant placement (years) |            |               | 13.75         | 6.00        | 9.08          | 12.58       | 12.00  | 2.17        | 14.92         | 15.25       |
| Date of implant loading (years) |                                   |            | 13.58         | unk           | 8.50        | 12.83         | unk         | 2.17   | 14.58       | 15.00         | 10.75       |
